# Supplementary material
Source: publisher figshare collection journal article supplement (https://karger.figshare.com/articles/dataset/_/5120521)

Supplementary Figure 1. Age Distribution in two different populations.

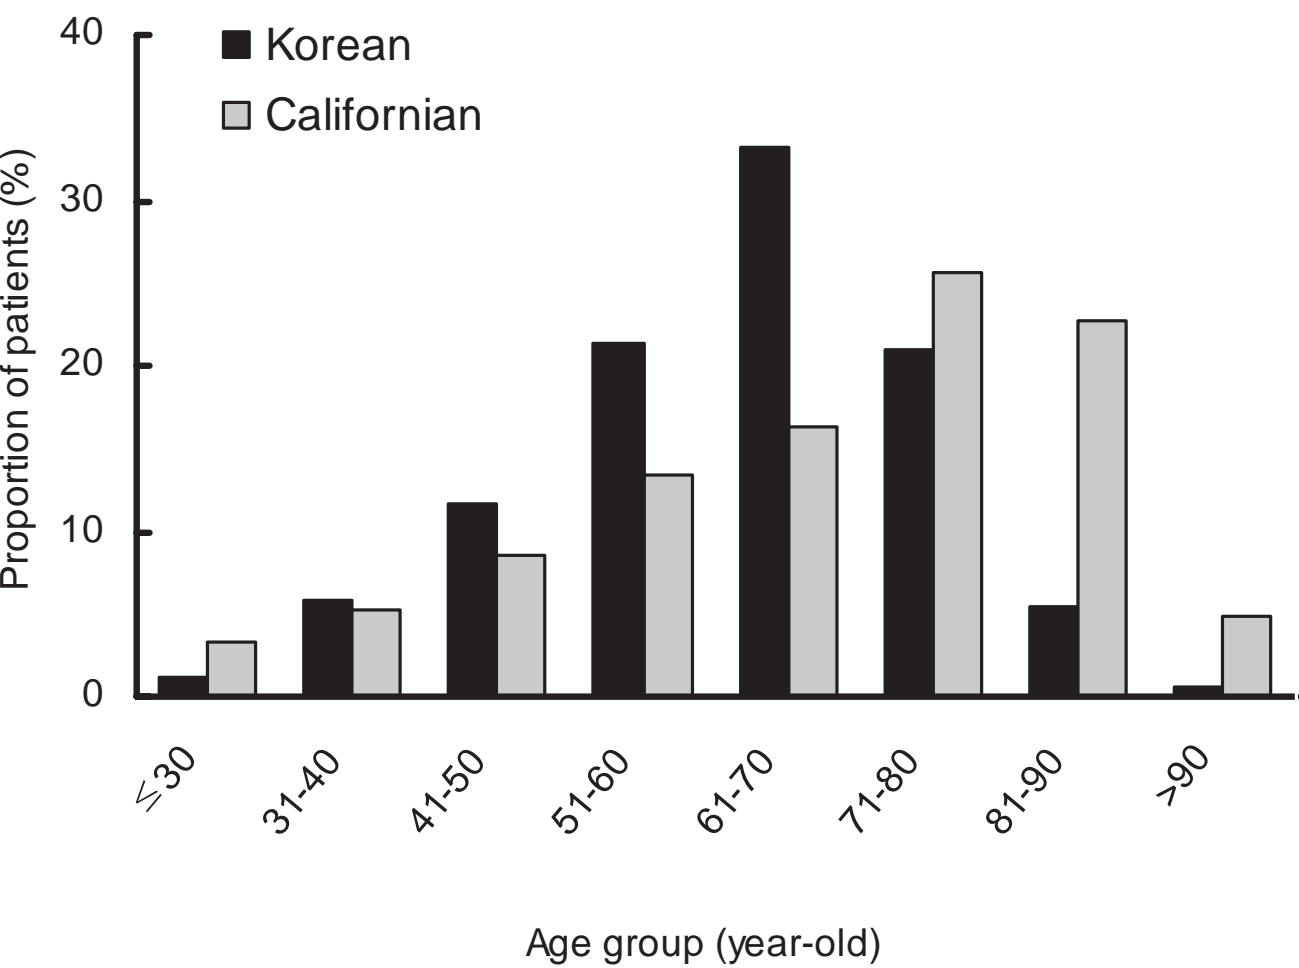

*Supplementary Figure 2. Differences in Stroke subtypes by Race-Ethnic group.*

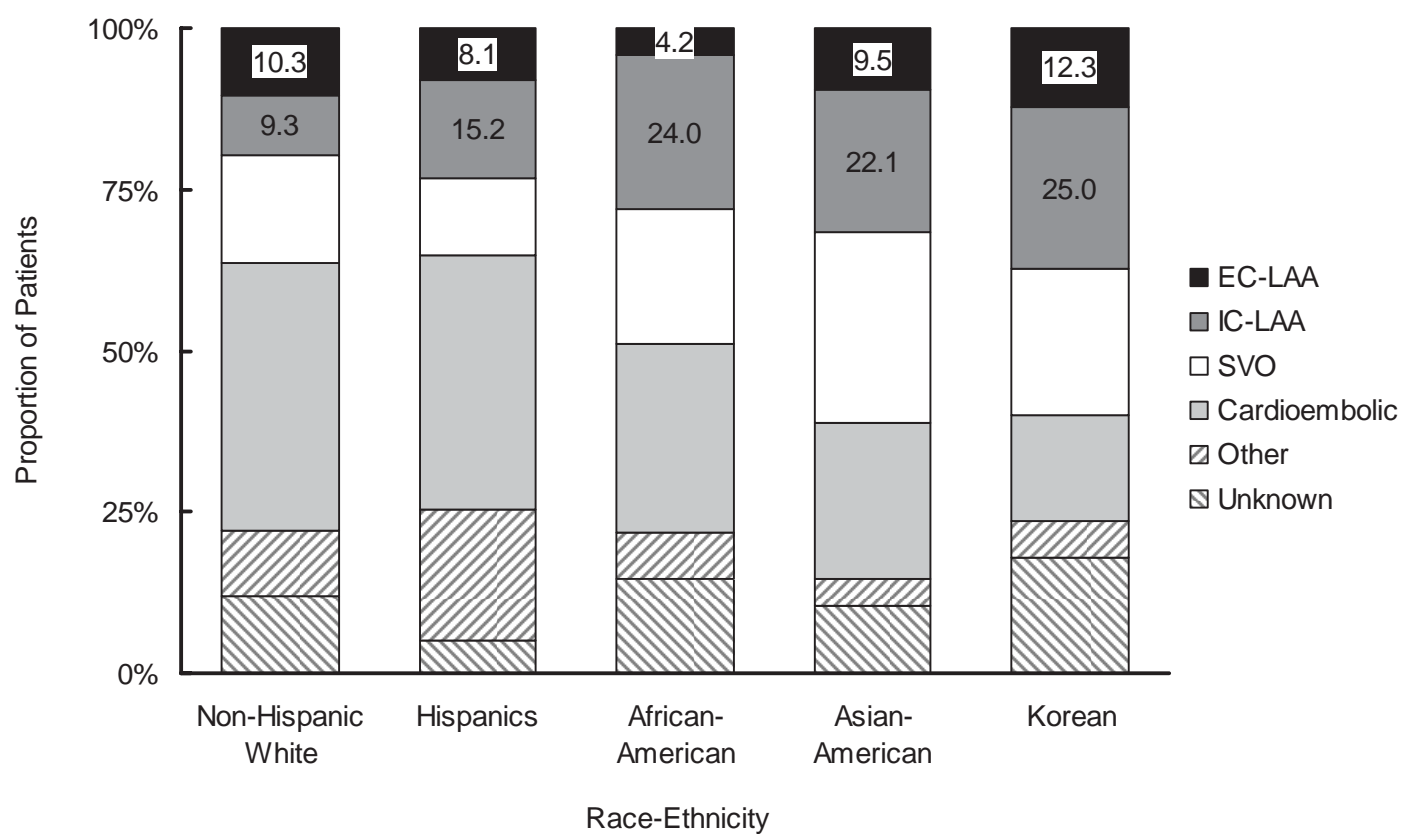

EC-LAA, extracranial atherosclerosis; IC-LAA, intracranial atherosclerosis; SVO, small vessel occlusion; and CE, cardioembolic.

Unknown cause included cryptogenic stroke, cause>1, and incomplete work ups.

Supplementary Figure 3. **Age and distribution of atherosclerosis.**

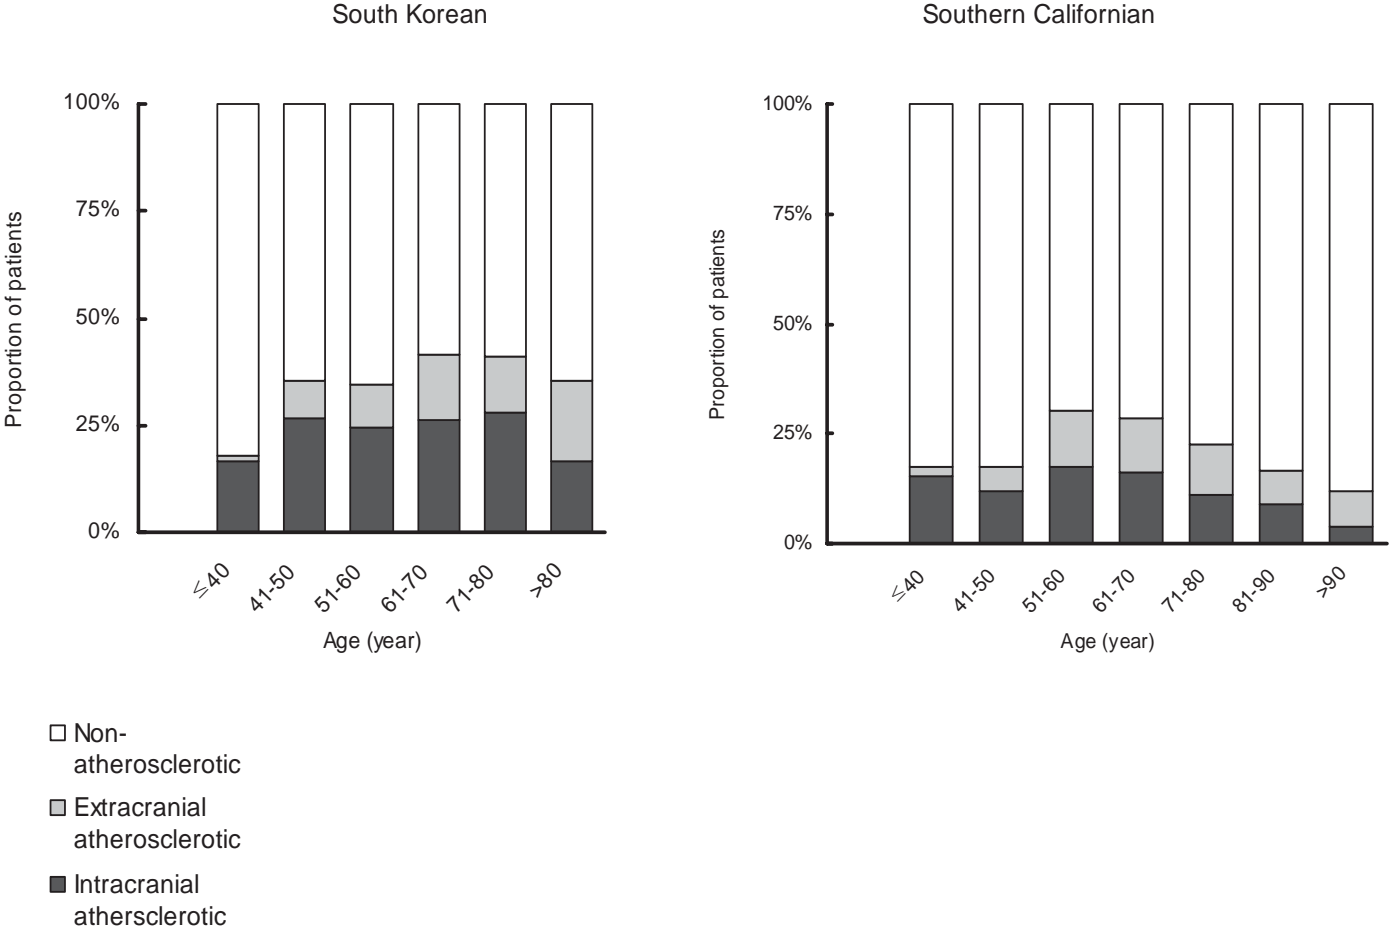

Supplement: Supplementary file 1 [file 1]
