# Supplementary material
Source: publisher figshare collection journal article supplement (https://karger.figshare.com/articles/dataset/_/5120521)
Supplement: Supplementary file 2 [file 1]

Supplementary Table 1. Differences in stroke risk factors by patients' age group.

|                    | South Korean |              |              | Southern Californian |              |              |
|--------------------|--------------|--------------|--------------|----------------------|--------------|--------------|
|                    | ≤50          | 51-75        | >75          | ≤50                  | 51-75        | >75          |
|                    | (N=369)      | (N=1,327)    | (N=286)      | (N=183)              | (N=445)      | (N=443)      |
| Stroke subtypes    |              |              |              |                      |              |              |
| Atherosclerotic    | 107 (29.0%)  | 534 (40.2%)  | 98 (34.3%)   | 32 (17.5%)           | 121 (27.2%)  | 80 (18.1%)   |
| Intracranial       | 85 (79.4%)   | 351 (65.7%)  | 60 (61.2%)   | 25 (78.1%)           | 63 (52.1%)   | 44 (55.0%)   |
| Extracranial       | 22 (20.6%)   | 183 (34.3%)  | 38 (38.8%)   | 7 (21.9%)            | 58 (47.9%)   | 36 (45.0%)   |
| Cardioembolic      | 39 (10.6%)   | 206 (15.5%)  | 80 (28.0%)   | 54 (29.5%)           | 159 (35.7%)  | 203 (45.8%)  |
| Lacunar            | 80 (21.7%)   | 312 (23.5%)  | 59 (20.6%)   | 22 (12.0%)           | 77 (17.3%)   | 91 (20.5%)   |
| Other              | 74 (20.1%)   | 37 (2.8%)    | 1 (0.3%)     | 61 (33.3%)           | 38 (8.5%)    | 12 (2.7%)    |
| Undetermined       | 69 (18.7%)   | 238 (17.9%)  | 48 (16.8%)   | 14 (7.7%)            | 50 (11.2%)   | 57 (12.9%)   |
| TIA vs. Stroke (%) | 75 (20.3%)*  | 137 (10.3%)  | 22 (7.7%)    | 25 (13.7%)           | 59 (13.2%)   | 67 (15.1%)   |
| Vascular territory |              |              |              |                      |              |              |
| Carotid            | 227 (61.5%)  | 820 (61.7%)  | 171 (59.8%)  | 118 (64.5%)          | 285 (64.0%)  | 326 (73.6%)  |
| Vertebrobasilar    | 113 (30.6%)  | 422 (31.8%)  | 90 (31.5%)   | 52 (28.4%)           | 136 (30.6%)  | 92 (20.8%)   |
| Both               | 3 (0.8%)     | 30 (2.3%)    | 12 (4.2%)    | 5 (2.7%)             | 10 (2.2%)    | 4 (0.9%)     |
| Unknown            | 26 (7.0%)    | 55 (4.2%)    | 13 (4.5%)    | 8 (4.4%)             | 14 (3.1%)    | 21 (4.7%)    |
| Risk factors       |              |              |              |                      |              |              |
| Male sex           | 276 (74.8%)* | 766 (57.7%)  | 128 (44.8%)  | 87 (47.5%)           | 261 (58.7%)  | 219 (49.4%)  |
| Hypertension       | 155 (42.0%)  | 844 (63.7%)* | 180 (63.2%)* | 51 (28.0%)           | 319 (71.8%)* | 353 (80.2%)* |
| Diabetes           | 53 (14.4%)   | 447 (33.7%)* | 59 (20.7%)   | 19 (10.4%)           | 144 (32.5%)* | 91 (20.7%)   |
| Dyslipidemia       | 72 (19.7%)   | 313 (23.7%)* | 37 (13.0%)   | 38 (21.5%)           | 181 (41.6%)* | 165 (39.0%)  |
| Smoking            |              |              |              |                      |              |              |
| Ex smoker          | 21 (5.7%)    | 110 (8.3%)   | 25 (8.8%)    | 23 (12.6%)           | 112 (25.2%)  | 94 (21.4%)   |
| Current smoker     | 190 (51.6%)* | 430 (32.4%)  | 50 (17.5%)   | 39 (21.3%)*          | 80 (18.0%)   | 24 (5.5%)    |
| Metabolic syndrome | 74 (28.8%)   | 448 (48.3%)* | 89 (38.5%)   | 48 (34.3%)           | 174 (49.9%)* | 105 (30.9%)  |

|                     |            |             |            |            |             |              |
|---------------------|------------|-------------|------------|------------|-------------|--------------|
| Stroke/TIA          | 72 (19.6%) | 333 (25.2%) | 62 (21.7%) | 35 (19.2%) | 129 (29.1%) | 151 (34.3%)* |
| CAOD                | 23 (6.3%)  | 128 (9.7%)  | 29 (10.1%) | 5 (2.7%)   | 98 (22.1%)  | 157 (35.7%)* |
| Laboratory findings |            |             |            |            |             |              |
| Glucose             | 108 62     | 131 75 *    | 121 69     | 115 42     | 133 58 *    | 125 46       |
| Total cholesterol   | 192 43 *   | 192 42 *    | 183 37     | 182 49 *   | 173 45      | 168 44       |
| LDL-cholesterol     | 114 39 *   | 115 37 *    | 108 31     | 108 39 *   | 103 37      | 99 35        |

\*  $P<0.05$ , between the age groups.
