# Supplementary material
Source: publisher figshare collection journal article supplement (https://karger.figshare.com/articles/dataset/_/5120521)
Supplement: Supplementary file 3 [file 1]

Archive with 2 entries (2 files):
- Figures.pdf
- table.pdf
